# Supplementary material for: Plasmonic vortex-coupled forward emission (PVCFE): a novel light coupling mechanism in aluminium nanostructures for high-efficiency, stable, and cost-effective organic photovoltaics
Source: Royal Society of Chemistry journal article supplement (doi:10.1039/d5cp03383g), 2025-11-25
Supplement: d5cp03383g1.zip [file Absorption-AlAl2O3 TE.xlsx]

## Sheet: Sheet1
lambda, Y
800, 0.396365
794.157, 0.388762
788.398, 0.38221
782.723, 0.37701
777.128, 0.373536
771.613, 0.372309
766.176, 0.374069
760.814, 0.379883
755.527, 0.391186
750.314, 0.409493
745.171, 0.435822
740.099, 0.470308
735.095, 0.512243
730.159, 0.560231
725.288, 0.612338
720.482, 0.666129
715.739, 0.718758
711.058, 0.767341
706.438, 0.809421
701.878, 0.843474
697.376, 0.869197
692.932, 0.887413
688.543, 0.899613
684.211, 0.907373
679.932, 0.911925
675.706, 0.914026
671.533, 0.914107
667.411, 0.912574
663.339, 0.91009
659.316, 0.907664
655.342, 0.906419
651.416, 0.90711
647.537, 0.909673
643.703, 0.913221
639.914, 0.916602
636.17, 0.918973
632.47, 0.920181
628.812, 0.920652
625.196, 0.920848
621.622, 0.921031
618.088, 0.921205
614.594, 0.921222
611.139, 0.920931
607.724, 0.920282
604.346, 0.919351
601.005, 0.918302
597.701, 0.917306
594.433, 0.916478
591.201, 0.915842
588.004, 0.915335
584.841, 0.914851
581.712, 0.91428
578.616, 0.913554
575.553, 0.912653
572.523, 0.911598
569.524, 0.910426
566.556, 0.909201
563.619, 0.90791
560.713, 0.906511
557.836, 0.904958
554.988, 0.903214
552.17, 0.901265
549.38, 0.899129
546.618, 0.896846
543.884, 0.894466
541.176, 0.892018
538.496, 0.889506
535.842, 0.886905
533.214, 0.884174
530.612, 0.881282
528.035, 0.878222
525.483, 0.87502
522.956, 0.871726
520.453, 0.868396
517.973, 0.865069
515.517, 0.861754
513.085, 0.858431
510.675, 0.855065
508.287, 0.851639
505.922, 0.84814
503.579, 0.844603
501.257, 0.841093
498.957, 0.837681
496.678, 0.834419
494.419, 0.831321
492.181, 0.828362
489.963, 0.825494
487.765, 0.822666
485.587, 0.819845
483.428, 0.81703
481.288, 0.814242
479.167, 0.811502
477.064, 0.808806
474.98, 0.806111
472.914, 0.803331
470.866, 0.800354
468.836, 0.797061
466.823, 0.793353
464.827, 0.789157
462.848, 0.784425
460.886, 0.779128
458.941, 0.773249
457.012, 0.766794
455.099, 0.759805
453.202, 0.752386
451.321, 0.744715
449.455, 0.737027
447.605, 0.729597
445.77, 0.72269
443.95, 0.716527
442.144, 0.711258
440.353, 0.706956
438.577, 0.703636
436.815, 0.701284
435.067, 0.699883
433.333, 0.699432
431.613, 0.699928
429.907, 0.70134
428.213, 0.703561
426.534, 0.706378
424.867, 0.709465
423.213, 0.712467
421.572, 0.715017
419.944, 0.716847
418.328, 0.717869
416.725, 0.718206
415.134, 0.718163
413.555, 0.718143
411.988, 0.718549
410.432, 0.719676
408.889, 0.721657
407.357, 0.724457
405.836, 0.72792
404.327, 0.731851
402.829, 0.736081
401.342, 0.740515
399.866, 0.745128
398.401, 0.749924
396.947, 0.754888
395.503, 0.759951
394.069, 0.764983
392.646, 0.769835
391.233, 0.774383
389.831, 0.778578
388.438, 0.782458
387.055, 0.786129
385.682, 0.789703
384.319, 0.793242
382.965, 0.79672
381.621, 0.800019
380.286, 0.802979
378.961, 0.805454
377.644, 0.807371
376.337, 0.808747
375.039, 0.809671
373.75, 0.810244
372.47, 0.810525
371.198, 0.810495
369.935, 0.810078
368.681, 0.809184
367.435, 0.807792
366.197, 0.805989
364.968, 0.803977
363.747, 0.802007
362.534, 0.800281
361.329, 0.79884
360.132, 0.797493
358.944, 0.79581
357.762, 0.793195
356.589, 0.789066
355.423, 0.783123
354.265, 0.775267
353.115, 0.765614
351.972, 0.754623
350.836, 0.742959
349.708, 0.731303
348.586, 0.720202
347.472, 0.709956
346.365, 0.700605
345.266, 0.691985
344.173, 0.683835
343.087, 0.675922
342.007, 0.668121
340.935, 0.660449
339.869, 0.653031
338.81, 0.646028
337.758, 0.639558
336.712, 0.633643
335.672, 0.628196
334.639, 0.623063
333.612, 0.618078
332.592, 0.613129
331.577, 0.608195
330.569, 0.603343
329.567, 0.598694
328.571, 0.594361
327.581, 0.590401
326.597, 0.586787
325.619, 0.58341
324.647, 0.580116
323.681, 0.576753
322.72, 0.573216
321.765, 0.569468
320.815, 0.565537
319.872, 0.561489
318.933, 0.557394
318.001, 0.553297
317.073, 0.549209
316.151, 0.54511
315.235, 0.540973
314.323, 0.536786
313.417, 0.532563
312.516, 0.528347
311.621, 0.524191
310.73, 0.520144
309.845, 0.516226
308.964, 0.512427
308.089, 0.50871
307.218, 0.505022
306.352, 0.501319
305.492, 0.497572
304.636, 0.493774
303.785, 0.48993
302.938, 0.486047
302.096, 0.48212
301.259, 0.478125
300.427, 0.474022
299.599, 0.469766
298.776, 0.465317
297.957, 0.460649
297.143, 0.455757
296.333, 0.450646
295.528, 0.445329
294.726, 0.439813
293.93, 0.434096
293.137, 0.428164
292.349, 0.422
291.565, 0.415593
290.785, 0.408939
290.01, 0.402049
289.238, 0.394942
288.471, 0.387642
287.707, 0.380169
286.948, 0.372539
286.193, 0.364757
285.442, 0.356827
284.694, 0.348755
283.951, 0.34055
283.211, 0.332233
282.475, 0.323828
281.743, 0.315362
281.015, 0.306859
280.291, 0.298338
279.57, 0.289811
278.853, 0.281288
278.14, 0.272779
277.43, 0.264299
276.724, 0.255864
276.021, 0.247497
275.322, 0.239219
274.627, 0.231048
273.935, 0.223
273.247, 0.215083
272.562, 0.207306
271.88, 0.199677
271.202, 0.192207
270.527, 0.184907
269.856, 0.177788
269.187, 0.170863
268.523, 0.16414
267.861, 0.157624
267.203, 0.151317
266.548, 0.145223
265.896, 0.139342
265.247, 0.133679
264.602, 0.128234
263.959, 0.12301
263.32, 0.118006
262.684, 0.113219
262.051, 0.108645
261.421, 0.10428
260.794, 0.100119
260.17, 0.0961615
259.549, 0.0924032
258.931, 0.0888408
258.315, 0.0854684
257.703, 0.0822779
257.094, 0.07926
256.487, 0.0764057
255.884, 0.0737081
255.283, 0.0711626
254.685, 0.0687665
254.09, 0.066517
253.497, 0.0644092
252.908, 0.0624351
252.321, 0.0605845
251.736, 0.0588464
251.155, 0.0572115
250.576, 0.0556743
250, 0.054233
