# Supplementary material for: Plasmonic vortex-coupled forward emission (PVCFE): a novel light coupling mechanism in aluminium nanostructures for high-efficiency, stable, and cost-effective organic photovoltaics
Source: Royal Society of Chemistry journal article supplement (doi:10.1039/d5cp03383g), 2025-11-25
Supplement: d5cp03383g1.zip [file Absorption-AlAl2O3 TM.xlsx]

## Sheet: Sheet1
lambda, Y
800, 0.332969
794.157, 0.327279
788.398, 0.322447
782.723, 0.31871
777.128, 0.316608
771.613, 0.31694
766.176, 0.320665
760.814, 0.328886
755.527, 0.342902
750.314, 0.364081
745.171, 0.393475
740.099, 0.431492
735.095, 0.477781
730.159, 0.531106
725.288, 0.589252
720.482, 0.649
715.739, 0.706428
711.058, 0.757811
706.438, 0.800528
701.878, 0.833587
697.376, 0.857436
692.932, 0.873289
688.543, 0.882503
684.211, 0.886388
679.932, 0.88629
675.706, 0.883637
671.533, 0.879788
667.411, 0.875846
663.339, 0.872615
659.316, 0.870681
655.342, 0.870465
651.416, 0.872084
647.537, 0.875154
643.703, 0.878845
639.914, 0.882302
636.17, 0.88495
632.47, 0.88668
628.812, 0.887728
625.196, 0.888256
621.622, 0.888345
618.088, 0.888078
614.594, 0.887617
611.139, 0.887191
607.724, 0.887006
604.346, 0.887166
601.005, 0.887642
597.701, 0.888332
594.433, 0.88914
591.201, 0.890043
588.004, 0.891095
584.841, 0.892379
581.712, 0.893943
578.616, 0.895758
575.553, 0.897722
572.523, 0.899699
569.524, 0.901572
566.556, 0.903337
563.619, 0.904982
560.713, 0.906532
557.836, 0.908031
554.988, 0.909497
552.17, 0.910917
549.38, 0.912259
546.618, 0.913483
543.884, 0.914557
541.176, 0.915457
538.496, 0.916173
535.842, 0.916696
533.214, 0.917024
530.612, 0.917156
528.035, 0.917098
525.483, 0.916856
522.956, 0.916436
520.453, 0.915836
517.973, 0.915047
515.517, 0.914054
513.085, 0.912841
510.675, 0.911405
508.287, 0.909773
505.922, 0.907956
503.579, 0.905998
501.257, 0.90395
498.957, 0.901848
496.678, 0.899707
494.419, 0.897518
492.181, 0.895259
489.963, 0.892913
487.765, 0.890478
485.587, 0.88797
483.428, 0.885419
481.288, 0.882844
479.167, 0.880242
477.064, 0.877576
474.98, 0.874785
472.914, 0.871799
470.866, 0.868553
468.836, 0.86499
466.823, 0.861053
464.827, 0.85667
462.848, 0.851748
460.886, 0.846187
458.941, 0.839904
457.012, 0.832864
455.099, 0.825106
453.202, 0.816737
451.321, 0.80792
449.455, 0.798841
447.605, 0.789691
445.77, 0.780654
443.95, 0.771901
442.144, 0.763587
440.353, 0.755837
438.577, 0.748737
436.815, 0.742322
435.067, 0.736581
433.333, 0.731486
431.613, 0.727015
429.907, 0.723174
428.213, 0.719997
426.534, 0.71752
424.867, 0.715746
423.213, 0.714651
421.572, 0.714152
419.944, 0.714156
418.328, 0.714599
416.725, 0.715474
415.134, 0.716822
413.555, 0.718692
411.988, 0.721106
410.432, 0.724025
408.889, 0.727367
407.357, 0.731043
405.836, 0.735
404.327, 0.739239
402.829, 0.743795
401.342, 0.748682
399.866, 0.753858
398.401, 0.759208
396.947, 0.764582
395.503, 0.769853
394.069, 0.774967
392.646, 0.77994
391.233, 0.784821
389.831, 0.789621
388.438, 0.794277
387.055, 0.798667
385.682, 0.802672
384.319, 0.806249
382.965, 0.809457
381.621, 0.81242
380.286, 0.815233
378.961, 0.817869
377.644, 0.820155
376.337, 0.821831
375.039, 0.822677
373.75, 0.822623
372.47, 0.821786
371.198, 0.820398
369.935, 0.818677
368.681, 0.816703
367.435, 0.8144
366.197, 0.811608
364.968, 0.808238
363.747, 0.804381
362.534, 0.800313
361.329, 0.796367
360.132, 0.792732
358.944, 0.789282
357.762, 0.785531
356.589, 0.780816
355.423, 0.774671
354.265, 0.766876
353.115, 0.757574
351.972, 0.747404
350.836, 0.737269
349.708, 0.72801
348.586, 0.72015
347.472, 0.713773
346.365, 0.708584
345.266, 0.704079
344.173, 0.699752
343.087, 0.69523
342.007, 0.690325
340.935, 0.684986
339.869, 0.679227
338.81, 0.673082
337.758, 0.66659
336.712, 0.65983
335.672, 0.652936
334.639, 0.646087
333.612, 0.639461
332.592, 0.633175
331.577, 0.627254
330.569, 0.621648
329.567, 0.616279
328.571, 0.611098
327.581, 0.606113
326.597, 0.601371
325.619, 0.596903
324.647, 0.59268
323.681, 0.588596
322.72, 0.584508
321.765, 0.580289
320.815, 0.57589
319.872, 0.571353
318.933, 0.566781
318.001, 0.562276
317.073, 0.557891
316.151, 0.55361
315.235, 0.549379
314.323, 0.545151
313.417, 0.540926
312.516, 0.536758
311.621, 0.532722
310.73, 0.52887
309.845, 0.525195
308.964, 0.521636
308.089, 0.518111
307.218, 0.514557
306.352, 0.510961
305.492, 0.507347
304.636, 0.50375
303.785, 0.500172
302.938, 0.496567
302.096, 0.492856
301.259, 0.488958
300.427, 0.484826
299.599, 0.480463
298.776, 0.475903
297.957, 0.471176
297.143, 0.466279
296.333, 0.461172
295.528, 0.455793
294.726, 0.450096
293.93, 0.444075
293.137, 0.437764
292.349, 0.431215
291.565, 0.424468
290.785, 0.417526
290.01, 0.410363
289.238, 0.402944
288.471, 0.395257
287.707, 0.387328
286.948, 0.379211
286.193, 0.370967
285.442, 0.36263
284.694, 0.354205
283.951, 0.34567
283.211, 0.337008
282.475, 0.328229
281.743, 0.319372
281.015, 0.310494
280.291, 0.301644
279.57, 0.292844
278.853, 0.284084
278.14, 0.275348
277.43, 0.266628
276.724, 0.257943
276.021, 0.249337
275.322, 0.240857
274.627, 0.232533
273.935, 0.224368
273.247, 0.216345
272.562, 0.20845
271.88, 0.200683
271.202, 0.193069
270.527, 0.185647
269.856, 0.178447
269.187, 0.171478
268.523, 0.164728
267.861, 0.158175
267.203, 0.151806
266.548, 0.145631
265.896, 0.139672
265.247, 0.133956
264.602, 0.128493
263.959, 0.123272
263.32, 0.118269
262.684, 0.113461
262.051, 0.108844
261.421, 0.104428
260.794, 0.100233
260.17, 0.0962669
259.549, 0.0925227
258.931, 0.0889762
258.315, 0.085601
257.703, 0.0823823
257.094, 0.079323
256.487, 0.0764364
255.884, 0.073733
255.283, 0.0712083
254.685, 0.0688422
254.09, 0.0666079
253.497, 0.0644864
252.908, 0.0624751
252.321, 0.0605844
251.736, 0.0588267
251.155, 0.0572031
250.576, 0.0556989
250, 0.0542896
