# Supplementary material for: Plasmonic vortex-coupled forward emission (PVCFE): a novel light coupling mechanism in aluminium nanostructures for high-efficiency, stable, and cost-effective organic photovoltaics
Source: Royal Society of Chemistry journal article supplement (doi:10.1039/d5cp03383g), 2025-11-25
Supplement: d5cp03383g1.zip [file Absorption-Intrinsic.xlsx]

## Sheet: Sheet1
lambda, Y
800, 0.00859123
794.157, 0.00664115
788.398, 0.00528374
782.723, 0.00474501
777.128, 0.00532117
771.613, 0.0073939
766.176, 0.0114437
760.814, 0.0180586
755.527, 0.027936
750.314, 0.0418705
745.171, 0.0607245
740.099, 0.0853679
735.095, 0.116575
730.159, 0.154852
725.288, 0.200238
720.482, 0.252025
715.739, 0.308461
711.058, 0.36669
706.438, 0.422978
701.878, 0.473375
697.376, 0.51463
692.932, 0.544962
688.543, 0.564315
684.211, 0.574025
679.932, 0.576192
675.706, 0.573106
671.533, 0.566918
667.411, 0.559556
663.339, 0.55274
659.316, 0.54796
655.342, 0.546311
651.416, 0.5482
647.537, 0.553096
643.703, 0.559597
639.914, 0.565947
636.17, 0.570627
632.47, 0.57286
628.812, 0.572699
625.196, 0.570672
621.622, 0.567496
618.088, 0.563845
614.594, 0.560223
611.139, 0.556932
607.724, 0.554094
604.346, 0.551695
601.005, 0.549631
597.701, 0.54776
594.433, 0.54594
591.201, 0.544055
588.004, 0.542035
584.841, 0.53986
581.712, 0.537562
578.616, 0.535213
575.553, 0.532912
572.523, 0.530766
569.524, 0.528874
566.556, 0.527348
563.619, 0.526234
560.713, 0.525541
557.836, 0.525254
554.988, 0.525328
552.17, 0.525695
549.38, 0.526272
546.618, 0.526977
543.884, 0.527736
541.176, 0.528495
538.496, 0.529222
535.842, 0.529913
533.214, 0.530587
530.612, 0.531284
528.035, 0.532056
525.483, 0.532957
522.956, 0.534041
520.453, 0.535346
517.973, 0.536893
515.517, 0.538683
513.085, 0.540696
510.675, 0.542893
508.287, 0.545238
505.922, 0.547654
503.579, 0.550078
501.257, 0.552463
498.957, 0.554767
496.678, 0.556963
494.419, 0.559042
492.181, 0.561008
489.963, 0.562876
487.765, 0.564667
485.587, 0.566402
483.428, 0.56809
481.288, 0.569727
479.167, 0.571287
477.064, 0.572717
474.98, 0.573939
472.914, 0.57485
470.866, 0.575326
468.836, 0.575235
466.823, 0.574451
464.827, 0.572868
462.848, 0.570419
460.886, 0.567096
458.941, 0.562962
457.012, 0.558151
455.099, 0.552867
453.202, 0.547361
451.321, 0.541903
449.455, 0.536756
447.605, 0.532141
445.77, 0.52822
443.95, 0.525086
442.144, 0.522769
440.353, 0.52124
438.577, 0.520434
436.815, 0.520262
435.067, 0.520634
433.333, 0.521462
431.613, 0.522679
429.907, 0.524233
428.213, 0.526093
426.534, 0.528237
424.867, 0.530647
423.213, 0.533342
421.572, 0.536315
419.944, 0.539546
418.328, 0.543009
416.725, 0.546668
415.134, 0.550474
413.555, 0.554372
411.988, 0.558301
410.432, 0.562206
408.889, 0.566037
407.357, 0.569758
405.836, 0.573348
404.327, 0.576805
402.829, 0.580145
401.342, 0.583396
399.866, 0.586596
398.401, 0.589787
396.947, 0.593005
395.503, 0.596274
394.069, 0.599604
392.646, 0.60298
391.233, 0.606366
389.831, 0.609705
388.438, 0.612921
387.055, 0.615927
385.682, 0.618633
384.319, 0.620952
382.965, 0.62281
381.621, 0.624153
380.286, 0.62495
378.961, 0.625199
377.644, 0.62492
376.337, 0.624156
375.039, 0.622965
373.75, 0.621411
372.47, 0.619559
371.198, 0.617464
369.935, 0.615167
368.681, 0.612692
367.435, 0.610046
366.197, 0.60722
364.968, 0.604193
363.747, 0.600941
362.534, 0.597435
361.329, 0.593656
360.132, 0.58959
358.944, 0.585236
357.762, 0.580599
356.589, 0.575716
355.423, 0.570726
354.265, 0.565729
353.115, 0.560765
351.972, 0.555908
350.836, 0.551255
349.708, 0.546899
348.586, 0.542921
347.472, 0.539384
346.365, 0.536328
345.266, 0.533766
344.173, 0.531687
343.087, 0.530054
342.007, 0.528807
340.935, 0.527875
339.869, 0.527175
338.81, 0.526623
337.758, 0.52614
336.712, 0.525658
335.672, 0.525123
334.639, 0.524499
333.612, 0.523769
332.592, 0.52293
331.577, 0.521994
330.569, 0.520982
329.567, 0.519919
328.571, 0.518834
327.581, 0.517748
326.597, 0.516677
325.619, 0.515625
324.647, 0.514585
323.681, 0.513536
322.72, 0.512449
321.765, 0.511288
320.815, 0.510013
319.872, 0.508585
318.933, 0.506972
318.001, 0.505151
317.073, 0.503109
316.151, 0.500848
315.235, 0.49838
314.323, 0.495729
313.417, 0.492926
312.516, 0.490008
311.621, 0.487014
310.73, 0.483977
309.845, 0.480928
308.964, 0.477885
308.089, 0.474859
307.218, 0.47185
306.352, 0.468845
305.492, 0.465827
304.636, 0.462768
303.785, 0.459639
302.938, 0.45641
302.096, 0.453052
301.259, 0.44954
300.427, 0.445856
299.599, 0.441988
298.776, 0.437928
297.957, 0.433678
297.143, 0.429241
296.333, 0.424624
295.528, 0.419833
294.726, 0.414876
293.93, 0.409757
293.137, 0.404478
292.349, 0.399036
291.565, 0.393427
290.785, 0.387644
290.01, 0.381678
289.238, 0.375521
288.471, 0.369167
287.707, 0.362614
286.948, 0.355863
286.193, 0.348919
285.442, 0.341793
284.694, 0.3345
283.951, 0.327059
283.211, 0.31949
282.475, 0.311817
281.743, 0.304061
281.015, 0.296244
280.291, 0.288383
279.57, 0.280497
278.853, 0.272598
278.14, 0.264699
277.43, 0.256809
276.724, 0.248937
276.021, 0.241093
275.322, 0.233286
274.627, 0.225528
273.935, 0.217832
273.247, 0.210215
272.562, 0.202695
271.88, 0.195289
271.202, 0.188018
270.527, 0.180901
269.856, 0.173954
269.187, 0.167194
268.523, 0.160633
267.861, 0.154278
267.203, 0.148137
266.548, 0.14221
265.896, 0.136498
265.247, 0.130998
264.602, 0.125705
263.959, 0.120617
263.32, 0.115728
262.684, 0.111038
262.051, 0.106543
261.421, 0.102243
260.794, 0.0981388
260.17, 0.0942302
259.549, 0.0905177
258.931, 0.0870008
258.315, 0.0836776
257.703, 0.0805445
257.094, 0.077596
256.487, 0.0748246
255.884, 0.0722215
255.283, 0.0697763
254.685, 0.0674786
254.09, 0.0653175
253.497, 0.0632832
252.908, 0.0613667
252.321, 0.0595606
251.736, 0.0578591
251.155, 0.0562579
250.576, 0.0547538
250, 0.0533446
