# Supplementary material for: Plasmonic vortex-coupled forward emission (PVCFE): a novel light coupling mechanism in aluminium nanostructures for high-efficiency, stable, and cost-effective organic photovoltaics
Source: Royal Society of Chemistry journal article supplement (doi:10.1039/d5cp03383g), 2025-11-25
Supplement: d5cp03383g1.zip [file EQE-AlAl2O3.xlsx]

## Sheet: Sheet1
Wavelength (nm)	EQE (%)
lambda(nm)	QE(%)
300.000000	3.732322e+01
310.000000	3.771751e+01
320.000000	3.813830e+01
330.000000	3.861239e+01
340.000000	3.904827e+01
350.000000	3.951942e+01
360.000000	3.996118e+01
370.000000	4.037743e+01
380.000000	4.058014e+01
390.000000	4.017596e+01
400.000000	3.933681e+01
410.000000	3.873852e+01
420.000000	3.863839e+01
430.000000	3.881945e+01
440.000000	3.989819e+01
450.000000	4.182843e+01
460.000000	4.343901e+01
470.000000	4.440147e+01
480.000000	4.506868e+01
490.000000	4.565499e+01
500.000000	4.615669e+01
510.000000	4.656582e+01
520.000000	4.689949e+01
530.000000	4.719297e+01
540.000000	4.750392e+01
550.000000	4.783648e+01
560.000000	4.826621e+01
570.000000	4.877386e+01
580.000000	4.925728e+01
590.000000	4.978790e+01
600.000000	5.028024e+01
610.000000	5.072017e+01
620.000000	5.127102e+01
630.000000	5.184952e+01
640.000000	5.260767e+01
650.000000	5.352562e+01
660.000000	5.425174e+01
670.000000	5.484249e+01
680.000000	5.569125e+01
690.000000	5.732644e+01
700.000000	5.990372e+01
710.000000	5.814636e+01
720.000000	5.185700e+01
730.000000	4.385333e+01
740.000000	3.677422e+01
750.000000	3.196645e+01
