# Supplementary material for: Plasmonic vortex-coupled forward emission (PVCFE): a novel light coupling mechanism in aluminium nanostructures for high-efficiency, stable, and cost-effective organic photovoltaics
Source: Royal Society of Chemistry journal article supplement (doi:10.1039/d5cp03383g), 2025-11-25
Supplement: d5cp03383g1.zip [file EQE-Intrinsic.xlsx]

## Sheet: Sheet1
Wavelength (nm)	EQE (%)
lambda(nm)	QE(%)
300.000000	2.313794e+01
310.000000	2.479075e+01
320.000000	2.603466e+01
330.000000	2.648675e+01
340.000000	2.662639e+01
350.000000	2.781886e+01
360.000000	2.991966e+01
370.000000	3.135131e+01
380.000000	3.200872e+01
390.000000	3.143087e+01
400.000000	3.067443e+01
410.000000	2.988215e+01
420.000000	2.902188e+01
430.000000	2.851267e+01
440.000000	2.866305e+01
450.000000	2.984886e+01
460.000000	3.155018e+01
470.000000	3.239009e+01
480.000000	3.246552e+01
490.000000	3.236007e+01
500.000000	3.214742e+01
510.000000	3.190043e+01
520.000000	3.177380e+01
530.000000	3.182833e+01
540.000000	3.197597e+01
550.000000	3.213249e+01
560.000000	3.240152e+01
570.000000	3.292141e+01
580.000000	3.365168e+01
590.000000	3.441902e+01
600.000000	3.512003e+01
610.000000	3.589348e+01
620.000000	3.688686e+01
630.000000	3.771825e+01
640.000000	3.773080e+01
650.000000	3.719490e+01
660.000000	3.761869e+01
670.000000	3.918805e+01
680.000000	4.062988e+01
690.000000	4.029047e+01
700.000000	3.707378e+01
710.000000	2.905664e+01
720.000000	1.961904e+01
730.000000	1.178053e+01
740.000000	6.432964e+00
750.000000	3.183439e+00
