# Supplementary material for: Plasmonic vortex-coupled forward emission (PVCFE): a novel light coupling mechanism in aluminium nanostructures for high-efficiency, stable, and cost-effective organic photovoltaics
Source: Royal Society of Chemistry journal article supplement (doi:10.1039/d5cp03383g), 2025-11-25
Supplement: d5cp03383g1.zip [file JV and Electrical-AlAl2O3.xlsx]

## Sheet: Sheet1
v(V)	jtot(mA/cm2)	j_total_rec(mA/cm2)	j_total_gen(mA/cm2)	jbulk(mA/cm2)	jifr(mA/cm2)	jminor_left(mA/cm2)	jminor_right(mA/cm2)	j_SRH(mA/cm2)
-0.018108	-18.1077	0.592111	18.6997	0.525816	0.0654235	0.000871271	3.10522e-13	0.525816
0.001911	-18.0888	0.61088	18.6997	0.540661	0.0693465	0.000872771	3.11333e-13	0.540661
0.021931	-18.0686	0.630819	18.6997	0.556379	0.0735657	0.000874242	3.12152e-13	0.556379
0.041953	-18.0472	0.652016	18.6997	0.573048	0.078092	0.000875678	3.12981e-13	0.573048
0.061976	-18.0244	0.674601	18.6997	0.59075	0.0829742	0.000877088	3.13818e-13	0.59075
0.082	-18.0001	0.698688	18.6997	0.609582	0.0882273	0.000878465	3.14664e-13	0.609582
0.102026	-17.9742	0.724409	18.6997	0.629651	0.0938786	0.000879809	3.1552e-13	0.629651
0.122053	-17.9465	0.751896	18.6997	0.651076	0.099938	0.000881112	3.16389e-13	0.651076
0.142083	-17.9169	0.781345	18.6997	0.673994	0.106469	0.000882382	3.17269e-13	0.673994
0.162115	-17.8851	0.812928	18.6997	0.698556	0.113488	0.000883615	3.18162e-13	0.698556
0.182149	-17.851	0.846851	18.6997	0.724937	0.121029	0.000884809	3.19069e-13	0.724937
0.202186	-17.8143	0.883321	18.6997	0.753332	0.129104	0.000885958	3.19993e-13	0.753332
0.222225	-17.7748	0.922649	18.6997	0.783967	0.137794	0.000887069	3.20933e-13	0.783967
0.242268	-17.7321	0.965113	18.6997	0.817102	0.147123	0.00088814	3.21891e-13	0.817102
0.262314	-17.686	1.01106	18.6997	0.853031	0.157135	0.000889168	3.22869e-13	0.853031
0.282364	-17.6359	1.06087	18.6997	0.892098	0.167884	0.000890154	3.23868e-13	0.892098
0.302418	-17.5816	1.11498	18.6997	0.934696	0.17939	0.000891094	3.24894e-13	0.934696
0.322478	-17.5224	1.17398	18.6997	0.981294	0.191796	0.000891997	3.25944e-13	0.981294
0.342542	-17.4577	1.23848	18.6997	1.03243	0.205158	0.00089286	3.27023e-13	1.03243
0.362613	-17.3868	1.30921	18.6997	1.08873	0.219586	0.000893685	3.28133e-13	1.08873
0.382691	-17.3088	1.38706	18.6997	1.15095	0.235222	0.000894474	3.29279e-13	1.15095
0.402777	-17.2226	1.47304	18.6997	1.21995	0.252198	0.000895225	3.30465e-13	1.21995
0.422873	-17.1269	1.56856	18.6997	1.29679	0.270873	0.00089595	3.31692e-13	1.29679
0.44298	-17.0201	1.67513	18.6997	1.38268	0.291556	0.00089665	3.32968e-13	1.38268
0.4631	-16.9003	1.79473	18.6997	1.47907	0.314759	0.000897329	3.34299e-13	1.47907
0.483235	-16.765	1.92979	18.6997	1.58766	0.341236	0.000897995	3.3569e-13	1.58766
0.503389	-16.6112	2.08341	18.6997	1.71038	0.372131	0.000898655	3.37151e-13	1.71038
0.523565	-16.4348	2.25961	18.6997	1.84949	0.409222	0.000899319	3.38691e-13	1.84949
0.543769	-16.2305	2.46367	18.6997	2.00744	0.455334	0.0009	3.40323e-13	2.00744
0.564009	-15.9912	2.70282	18.6997	2.18689	0.515028	0.000900714	3.4206e-13	2.18689
0.584293	-15.7066	2.98719	18.6997	2.3906	0.595694	0.000901484	3.43916e-13	2.3906
0.604638	-15.3623	3.33131	18.6997	2.62125	0.709157	0.000902338	3.45907e-13	2.62125
0.625062	-14.9378	3.75572	18.6997	2.88111	0.873705	0.000903324	3.48039e-13	2.88111
0.645595	-14.4053	4.28798	18.6997	3.1715	1.11558	0.000904491	3.50318e-13	3.1715
0.666268	-13.7316	4.96145	18.6997	3.49143	1.46911	0.000905913	3.52723e-13	3.49143
0.687117	-12.8825	5.81038	18.6997	3.83634	1.97313	0.00090766	3.5522e-13	3.83634
0.70817	-11.8302	6.86251	18.6997	4.19651	2.66509	0.000909797	3.57756e-13	4.19651
0.729442	-10.5582	8.1342	18.6997	4.55654	3.57674	0.000912354	3.60291e-13	4.55654
0.750934	-9.06559	9.62655	18.6997	4.89439	4.73124	0.000915351	3.62767e-13	4.89439
0.772637	-7.36262	11.3293	18.6997	5.18333	6.14509	0.000918763	3.65166e-13	5.18333
0.794528	-5.47238	13.2194	18.6997	5.39476	7.82374	0.00092254	3.67475e-13	5.39476
0.816567	-3.43313	15.2585	18.6997	5.50379	9.75377	0.000926612	3.69688e-13	5.50379
0.838699	-1.30059	17.3908	18.6997	5.49557	11.8943	0.000930899	3.71795e-13	5.49557
0.860854	0.854267	19.5455	18.6997	5.36971	14.1748	0.00093532	3.73779e-13	5.36971
