# Supplementary material for: Plasmonic vortex-coupled forward emission (PVCFE): a novel light coupling mechanism in aluminium nanostructures for high-efficiency, stable, and cost-effective organic photovoltaics
Source: Royal Society of Chemistry journal article supplement (doi:10.1039/d5cp03383g), 2025-11-25
Supplement: d5cp03383g1.zip [file JV and Electrical-Intrinsic.xlsx]

## Sheet: Sheet1
v(V)	jtot(mA/cm2)	j_total_rec(mA/cm2)	j_total_gen(mA/cm2)	jbulk(mA/cm2)	jifr(mA/cm2)	jminor_left(mA/cm2)	jminor_right(mA/cm2)	j_SRH(mA/cm2)
-0.01162	-11.6199	0.463504	12.0833	0.388007	0.0751215	0.000375139	4.41509e-28	0.388007
0.008397	-11.6033	0.479988	12.0833	0.398989	0.0806232	0.000375968	4.42971e-28	0.398989
0.028415	-11.5854	0.497603	12.0833	0.410594	0.086632	0.000376786	4.44444e-28	0.410594
0.048434	-11.5664	0.516444	12.0833	0.422872	0.0931938	0.000377591	4.45931e-28	0.422872
0.068454	-11.546	0.536615	12.0833	0.435876	0.10036	0.000378382	4.47432e-28	0.435876
0.088476	-11.5242	0.558208	12.0833	0.449662	0.108166	0.000379156	4.4895e-28	0.449662
0.108499	-11.5009	0.581384	12.0833	0.464299	0.116705	0.000379917	4.50483e-28	0.464299
0.128524	-11.4758	0.606258	12.0833	0.479854	0.126023	0.000380661	4.52035e-28	0.479854
0.148551	-11.4489	0.632972	12.0833	0.496406	0.136185	0.000381387	4.53606e-28	0.496406
0.16858	-11.42	0.661676	12.0833	0.514038	0.147256	0.000382094	4.55198e-28	0.514038
0.188611	-11.3889	0.692493	12.0833	0.532837	0.159274	0.000382779	4.56816e-28	0.532837
0.208644	-11.3556	0.725664	12.0833	0.552917	0.172364	0.000383446	4.58457e-28	0.552917
0.22868	-11.3197	0.761341	12.0833	0.574386	0.186571	0.000384091	4.60126e-28	0.574386
0.248719	-11.2811	0.799721	12.0833	0.597371	0.201965	0.000384713	4.61826e-28	0.597371
0.26876	-11.2396	0.841013	12.0833	0.622013	0.218615	0.000385312	4.63559e-28	0.622013
0.288805	-11.1951	0.885383	12.0833	0.648461	0.236537	0.000385885	4.6533e-28	0.648461
0.308853	-11.1471	0.933185	12.0833	0.676909	0.25589	0.000386436	4.67139e-28	0.676909
0.328905	-11.0954	0.98464	12.0833	0.707551	0.276702	0.000386963	4.68992e-28	0.707551
0.34896	-11.0398	1.04005	12.0833	0.740619	0.29904	0.000387464	4.70892e-28	0.740619
0.36902	-10.9799	1.09974	12.0833	0.776378	0.322979	0.000387942	4.72846e-28	0.776378
0.389085	-10.9153	1.16412	12.0833	0.815133	0.348602	0.000388395	4.74857e-28	0.815133
0.409154	-10.8457	1.23354	12.0833	0.857231	0.375919	0.000388823	4.76936e-28	0.857231
0.42923	-10.7703	1.30871	12.0833	0.903107	0.405217	0.000389231	4.79083e-28	0.903107
0.449311	-10.6886	1.39022	12.0833	0.953242	0.436587	0.000389618	4.81308e-28	0.953242
0.4694	-10.5998	1.47886	12.0833	1.00821	0.470255	0.000389985	4.83621e-28	1.00821
0.489497	-10.5028	1.57564	12.0833	1.0687	0.506543	0.000390336	4.86033e-28	1.0687
0.509604	-10.3964	1.68183	12.0833	1.13552	0.545918	0.000390671	4.88555e-28	1.13552
0.529721	-10.279	1.79908	12.0833	1.20961	0.589079	0.000390995	4.91202e-28	1.20961
0.549852	-10.1483	1.92955	12.0833	1.29207	0.637097	0.000391312	4.93992e-28	1.29207
0.569999	-10.0014	2.07619	12.0833	1.38415	0.691654	0.000391625	4.96946e-28	1.38415
0.590166	-9.83434	2.24309	12.0833	1.48723	0.755469	0.00039194	5.00089e-28	1.48723
0.610359	-9.64103	2.43621	12.0833	1.6028	0.833015	0.000392267	5.03452e-28	1.6028
0.630587	-9.41262	2.66442	12.0833	1.7323	0.931725	0.000392615	5.07068e-28	1.7323
0.650864	-9.13559	2.94124	12.0833	1.87701	1.06384	0.000393002	5.10971e-28	1.87701
0.67121	-8.78988	3.28676	12.0833	2.03754	1.24883	0.000393451	5.15184e-28	2.03754
0.691652	-8.34762	3.72883	12.0833	2.21298	1.51546	0.000393997	5.19705e-28	2.21298
0.712225	-7.7753	4.30096	12.0833	2.3996	1.90097	0.000394678	5.24496e-28	2.3996
0.732959	-7.04058	5.03548	12.0833	2.58929	2.4458	0.000395536	5.29469e-28	2.58929
0.753877	-6.12297	5.95288	12.0833	2.76903	3.18346	0.0003966	5.345e-28	2.76903
0.774978	-5.02223	7.0534	12.0833	2.92189	4.13112	0.000397885	5.3946e-28	2.92189
0.79624	-3.7602	8.31523	12.0833	3.02969	5.28514	0.00039938	5.44235e-28	3.02969
0.817623	-2.3771	9.69814	12.0833	3.07727	6.62047	0.000401064	5.48755e-28	3.07727
0.839073	-0.926548	11.1485	12.0833	3.05629	8.0918	0.000402903	5.52966e-28	3.05629
0.860531	0.530503	12.6053	12.0833	2.96794	9.637	0.000404868	5.56823e-28	2.96794
