# Supplementary material for: Plasmonic vortex-coupled forward emission (PVCFE): a novel light coupling mechanism in aluminium nanostructures for high-efficiency, stable, and cost-effective organic photovoltaics
Source: Royal Society of Chemistry journal article supplement (doi:10.1039/d5cp03383g), 2025-11-25
Supplement: d5cp03383g1.zip [file Transmission-AlAl2O3 TE.xlsx]

## Sheet: Sheet1
lambda(nm), Y
800, 0.0347624
785.479, 0.0323181
771.475, 0.0309531
757.962, 0.0309181
744.914, 0.0330907
732.308, 0.0359792
720.121, 0.0363253
708.333, 0.0332383
696.925, 0.0288445
685.879, 0.0253583
675.177, 0.0237333
664.804, 0.0239629
654.746, 0.0250239
644.986, 0.0256461
635.514, 0.0257412
626.316, 0.0260491
617.38, 0.0268132
608.696, 0.0279196
600.252, 0.0294892
592.04, 0.031465
584.049, 0.0335214
576.271, 0.035687
568.698, 0.0381431
561.321, 0.0406527
554.133, 0.0430135
547.126, 0.0454589
540.295, 0.0480314
533.632, 0.050411
527.132, 0.0526057
520.788, 0.0548658
514.595, 0.0570337
508.547, 0.0588645
502.64, 0.0605536
496.868, 0.0622443
491.228, 0.0637025
485.714, 0.0649228
480.323, 0.0662469
475.05, 0.0677912
469.891, 0.0696095
464.844, 0.0721893
459.903, 0.0759938
455.067, 0.0809161
450.331, 0.0865812
445.693, 0.092432
441.149, 0.0974531
436.697, 0.10074
432.334, 0.101988
428.058, 0.100659
423.865, 0.0961511
419.753, 0.0902814
415.721, 0.0875123
411.765, 0.0903602
407.883, 0.0961681
404.075, 0.10049
400.336, 0.101877
396.667, 0.101417
393.064, 0.09973
389.525, 0.0967969
386.05, 0.0932611
382.637, 0.0898825
379.283, 0.0866193
375.987, 0.0832944
372.749, 0.0801242
369.565, 0.0770197
366.436, 0.0734542
363.359, 0.0692979
360.333, 0.0648567
357.357, 0.0602229
354.43, 0.0555276
351.551, 0.0515364
348.718, 0.0491268
345.93, 0.0484273
343.187, 0.0489038
340.486, 0.0497484
337.828, 0.0499365
335.211, 0.0487079
332.635, 0.0463212
330.097, 0.0436971
327.598, 0.0412548
325.137, 0.0387488
322.712, 0.0360854
320.323, 0.0334901
317.969, 0.0309771
315.65, 0.0283784
313.364, 0.0257956
311.111, 0.0234635
308.89, 0.0213403
306.701, 0.0192719
304.543, 0.0173229
302.414, 0.0155928
300.315, 0.0139753
298.246, 0.0123708
296.204, 0.0108665
294.19, 0.00952338
292.204, 0.00825371
290.244, 0.00702396
288.31, 0.0059248
286.402, 0.0049809
284.519, 0.00411905
282.66, 0.00333339
280.826, 0.00268358
279.015, 0.00215607
277.228, 0.00169123
275.463, 0.00129562
273.721, 0.000999241
272, 0.000771859
270.301, 0.000576021
268.623, 0.000425202
266.966, 0.000327918
265.329, 0.000254058
263.712, 0.0001895
262.115, 0.000149091
260.536, 0.000127754
258.977, 0.000104804
257.436, 8.42688e-05
255.914, 7.72808e-05
254.409, 7.22316e-05
252.922, 6.0972e-05
251.453, 5.60694e-05
250, 5.9248e-05
