# Supplementary material for: Plasmonic vortex-coupled forward emission (PVCFE): a novel light coupling mechanism in aluminium nanostructures for high-efficiency, stable, and cost-effective organic photovoltaics
Source: Royal Society of Chemistry journal article supplement (doi:10.1039/d5cp03383g), 2025-11-25
Supplement: d5cp03383g1.zip [file Transmission-AlAl2O3 TM.xlsx]

## Sheet: Sheet1
lambda(nm), Y
800, 0.145461
785.479, 0.136701
771.475, 0.125254
757.962, 0.109794
744.914, 0.0913864
732.308, 0.0727271
720.121, 0.0564967
708.333, 0.0453496
696.925, 0.0396653
685.879, 0.0376219
675.177, 0.0377515
664.804, 0.0384267
654.746, 0.037836
644.986, 0.0361262
635.514, 0.0345756
626.316, 0.033553
617.38, 0.0328709
608.696, 0.0322798
600.252, 0.0314866
592.04, 0.0305471
584.049, 0.0295726
576.271, 0.0284665
568.698, 0.0273218
561.321, 0.0262374
554.133, 0.0251253
547.126, 0.0240768
540.295, 0.0231849
533.632, 0.0223465
527.132, 0.0216147
520.788, 0.0210736
514.595, 0.0206209
508.547, 0.0202684
502.64, 0.0200741
496.868, 0.019933
491.228, 0.0198259
485.714, 0.0197864
480.323, 0.019713
475.05, 0.0196006
469.891, 0.0195472
464.844, 0.0195672
459.903, 0.0197689
455.067, 0.0203167
450.331, 0.0211019
445.693, 0.021753
441.149, 0.0217299
436.697, 0.0204986
432.334, 0.0181095
428.058, 0.0152968
423.865, 0.0127922
419.753, 0.0109903
415.721, 0.0100802
411.765, 0.010023
407.883, 0.0106569
404.075, 0.0119237
400.336, 0.0138022
396.667, 0.0163042
393.064, 0.0195393
389.525, 0.0234014
386.05, 0.0274782
382.637, 0.0315081
379.283, 0.0354179
375.987, 0.0389881
372.749, 0.0420314
369.565, 0.0445019
366.436, 0.046113
363.359, 0.0465302
360.333, 0.0458445
357.357, 0.0440949
354.43, 0.0410426
351.551, 0.0371429
348.718, 0.0334808
345.93, 0.030333
343.187, 0.0274156
340.486, 0.0252835
337.828, 0.0244948
335.211, 0.0241565
332.635, 0.0231717
330.097, 0.0217701
327.598, 0.020521
325.137, 0.0193206
322.712, 0.0180515
320.323, 0.0168632
317.969, 0.0156984
315.65, 0.0144654
313.364, 0.0132911
311.111, 0.0122066
308.89, 0.0111343
306.701, 0.0101305
304.543, 0.0092269
302.414, 0.00834615
300.315, 0.0075014
298.246, 0.00673381
296.204, 0.00599094
294.19, 0.00526789
292.204, 0.00461303
290.244, 0.00400089
288.31, 0.0034143
286.402, 0.00289487
284.519, 0.00243548
282.66, 0.00201
280.826, 0.00164323
279.015, 0.0013373
277.228, 0.0010649
275.463, 0.000836464
273.721, 0.000658652
272, 0.000508256
270.301, 0.000385717
268.623, 0.000298281
266.966, 0.0002289
265.329, 0.000173582
263.712, 0.000138592
262.115, 0.000112143
260.536, 8.97366e-05
258.977, 7.75064e-05
257.436, 6.7954e-05
255.914, 5.78684e-05
254.409, 5.38631e-05
252.922, 5.08238e-05
251.453, 4.59712e-05
250, 4.60031e-05
