# Supplementary material for: Plasmonic vortex-coupled forward emission (PVCFE): a novel light coupling mechanism in aluminium nanostructures for high-efficiency, stable, and cost-effective organic photovoltaics
Source: Royal Society of Chemistry journal article supplement (doi:10.1039/d5cp03383g), 2025-11-25
Supplement: d5cp03383g1.zip [file Transmission-Intrinsic.xlsx]

## Sheet: Sheet1
lambda(nm), Y
800, 0.843909
785.479, 0.855429
771.475, 0.865597
757.962, 0.856978
744.914, 0.812761
732.308, 0.728015
720.121, 0.615076
708.333, 0.499148
696.925, 0.40647
685.879, 0.352141
675.177, 0.334616
664.804, 0.339417
654.746, 0.348863
644.986, 0.351485
635.514, 0.345874
626.316, 0.337956
617.38, 0.334754
608.696, 0.339248
600.252, 0.349225
592.04, 0.359842
584.049, 0.3673
576.271, 0.370902
568.698, 0.372499
561.321, 0.374347
554.133, 0.377257
547.126, 0.380299
540.295, 0.381909
533.632, 0.381266
527.132, 0.378838
520.788, 0.375843
514.595, 0.373224
508.547, 0.371007
502.64, 0.368454
496.868, 0.364798
491.228, 0.359937
485.714, 0.354633
480.323, 0.350187
475.05, 0.347905
469.891, 0.348695
464.844, 0.352899
459.903, 0.360251
455.067, 0.36984
450.331, 0.380095
445.693, 0.388966
441.149, 0.394401
436.697, 0.395
432.334, 0.390511
428.058, 0.381865
423.865, 0.370663
419.753, 0.358411
415.721, 0.345934
411.765, 0.333272
407.883, 0.320061
404.075, 0.306072
400.336, 0.291526
396.667, 0.277025
393.064, 0.263186
389.525, 0.250308
386.05, 0.2383
382.637, 0.226884
379.283, 0.215887
375.987, 0.205375
372.749, 0.19552
369.565, 0.186341
366.436, 0.177541
363.359, 0.168604
360.333, 0.159128
357.357, 0.14916
354.43, 0.139305
351.551, 0.130488
348.718, 0.123508
345.93, 0.118624
343.187, 0.115425
340.486, 0.113037
337.828, 0.110536
335.211, 0.107326
332.635, 0.103298
330.097, 0.0987117
327.598, 0.0939301
325.137, 0.089176
322.712, 0.0844422
320.323, 0.0795682
317.969, 0.0743991
315.65, 0.0689088
313.364, 0.0632216
311.111, 0.0575402
308.89, 0.0520446
306.701, 0.0468286
304.543, 0.041903
302.414, 0.037243
300.315, 0.0328385
298.246, 0.0287128
296.204, 0.0249064
294.19, 0.0214473
292.204, 0.0183329
290.244, 0.0155362
288.31, 0.0130264
286.402, 0.0107867
284.519, 0.00881679
282.66, 0.00712124
280.826, 0.00569355
279.015, 0.0045096
277.228, 0.00353332
275.463, 0.00272926
273.721, 0.00207208
272, 0.00154718
270.301, 0.00114372
268.623, 0.000846737
266.966, 0.000634542
265.329, 0.000482734
263.712, 0.000370911
262.115, 0.000286837
260.536, 0.000225388
258.977, 0.000183922
257.436, 0.00015813
255.914, 0.000141415
254.409, 0.00012759
252.922, 0.000114019
251.453, 0.000102262
250, 9.56109e-05
